# Supplementary material
Source: Springer Nature journal article supplement (https://www.springermedizin.de/resource/supplementary/13058_2005_1332_MOESM1_ESM.pdf/9698874)

■ AdCXCR4Luc ■ AdSurvivinLuc ■ AdCox2MLuc ■ AdSLPILuc □ AdEGP-2Luc

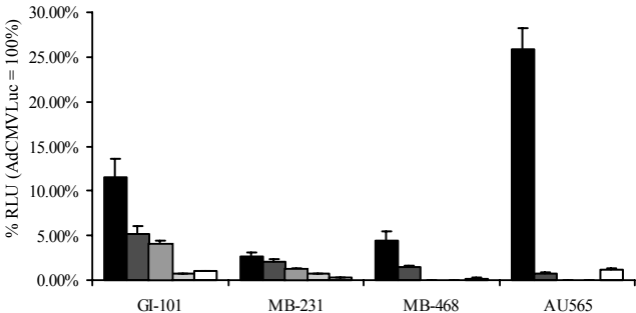

Supplement: MOESM1 [file 9698874]
